# Supplementary material for: Optimized Antibacterial Effects in a Designed Mixture of Essential Oils of Myrtus communis, Artemisia herba-alba and Thymus serpyllum for Wide Range of Applications
Source: MDPI journal article supplement (doi:10.3390/foods11010132), 2022-01-05
Supplement: s1 [file s1]

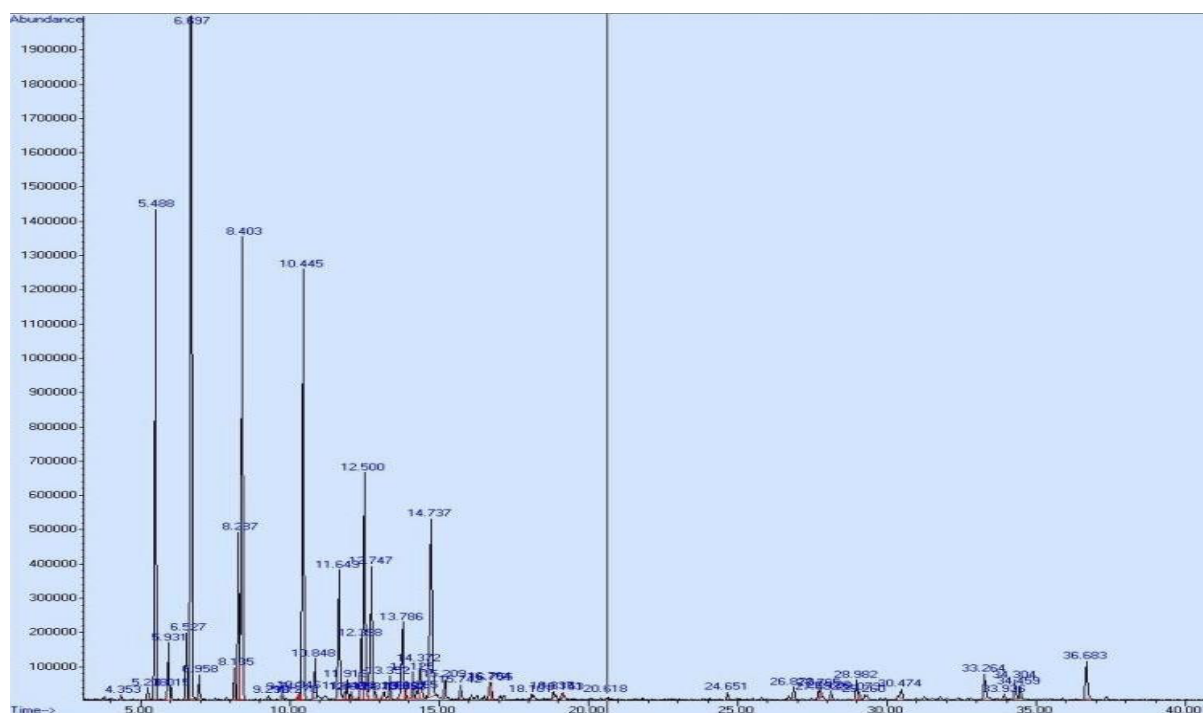

Supplementary Figure S3. *A. herba-alba* GC analysis Chromatogram

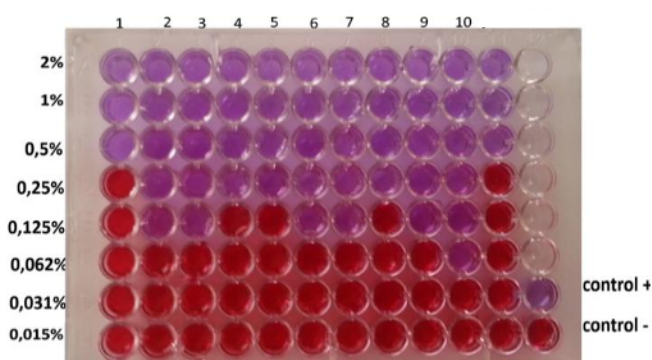

Supplementary Figure S4. CMI results of the formulation against *B. subtilis*

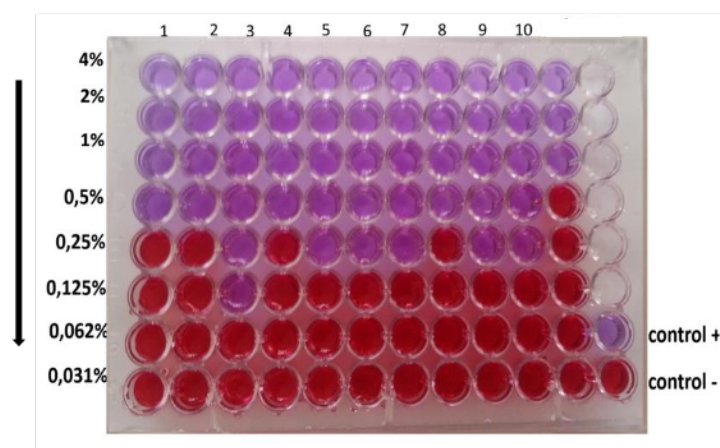

Supplementary Figure S5. CMI results of the formulation against *S. aureus*

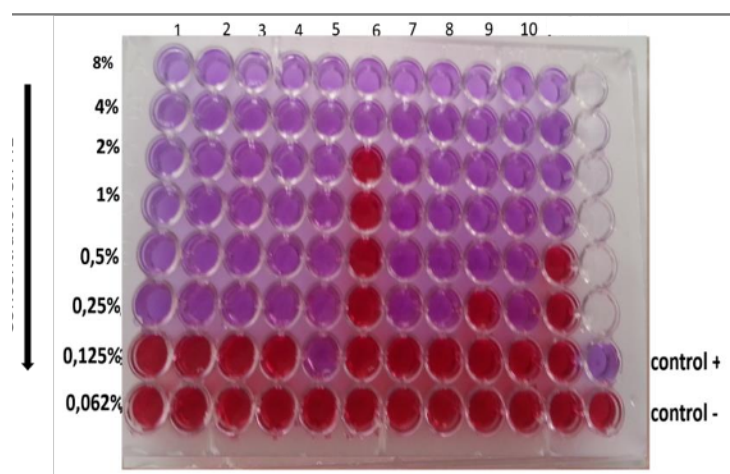

Supplementary Figure S6. CMI results of the formulation against *E. Coli*
